# Supplementary material for: Compositional doping and structure insights for high-performance aqueous Zn-ion batteries
Source: Royal Society of Chemistry journal article supplement (doi:10.1039/d5cc01103e), 2025-01-01
Supplement: d5cc01103e1.pdf [file d5cc01103e1.pdf]

## Support Information

### Compositional Doping and Structure Insights for High-Performance

#### Aqueous Zn-Ion Batteries

Jianxin Yang,<sup>†a</sup> Yuchen Jiang,<sup>†a</sup> Tao Wang,<sup>a</sup> Shuai Tong,<sup>a</sup> Yang Wang,<sup>a</sup> Dianwu Kang,<sup>a</sup> Shutong Lu,<sup>a</sup> Mengqi Zhang,<sup>a</sup> Min Jia<sup>\*a</sup> and Xiaoyu Zhang<sup>\*a</sup>

*a. School of Material Science and Engineering, Jiangsu University, Zhenjiang, 212013, China. E-mail: mja@ujs.edu.cn; x.zhang@ujs.edu.cn.*

*† These authors contributed equally to this work.*

## *Synthesis of Mg-MnO*

MnO was synthesized using a co-precipitation method followed by high-temperature calcination. A mixture of 200 mL of  $\text{MnSO}_4 \cdot \text{H}_2\text{O}$  solution and 100 mL of  $\text{Na}_2\text{CO}_3$  solution (with a molar ratio of 2:1) was slowly added to a mixture of ethanol and water, stirred continuously for 2 hours, then left to stand for 1 hour before centrifugation. The resulting manganese carbonate precursor was dried overnight in a 70°C oven. Subsequently, the carbonate was calcined in a tube furnace filled with argon at 600°C for 2 hours to obtain MnO. To synthesize Mg-doped MnO with varying magnesium content, different amounts of  $\text{Mg}(\text{NO}_3)_2 \cdot 6\text{H}_2\text{O}$  were added to the manganese sulfate solution, while keeping all other conditions constant.<sup>1</sup>

## *Assembled coin AZIBs and electrochemical measurement*

The electrochemical evaluation was carried out by assembling into a CR2032-type coin cell. The cathode consisted of Mg-MnO, acetylene black and polytetrafluoroethylene (PVDF) were mixed by a mass ratio of 7:2:1 and suitable N-methyl pyrrolidone (NMP) was added to the mixed powder. Then put the mixture on the the magnetic mixer, stirring for 2 hours to obtain the uniform slurry before being coated on a stainless steel wire and dried at 80 °C for whole night by vacuum. Then, the electrodes were cut into circular pole pieces with a diameter of 12 mm. Zinc foils(16 mm) and glass fiber membranes(16 mm) (Whatman, GF/A) were used as the anode and separators. The electrolyte used was an aqueous solution of 2 M  $\text{ZnSO}_4$  and 0.2 M  $\text{MnSO}_4$ .

The cycle performance and rate performance were measured on a battery test system (LAND System, Wuhan). Cyclic voltammetry (CV) was performed on an electrochemical workstation (CHI760E, Shanghai).

## *Materials characterization*

X-ray diffraction (XRD) patterns were investigated on a Bruker D8 X-ray diffractometer with Cu K radiation. The morphology was conducted by scanning electron microscopy (SEM, ZEISS GeminiSEM 300) and the transmission electron microscopy (TEM, FEI Tecnai F20). The chemical composition and element valence of Mg-MnO were measured by X-ray photoelectron spectroscopy (XPS, Thermo Scientific K-Alpha).

## *GITT Calculations*

Galvanostatic intermittence titration technique (GITT) technique was used to calculate the  $\text{Zn}^{2+}$  diffusivity coefficient reflecting the kinetic behavior of Mg-MnO and the  $\text{Zn}^{2+}$  diffusivity coefficient was calculated based on equation:

$$D = \frac{4L^2}{\pi\tau} \left( \frac{\Delta E_s}{\Delta E_t} \right)^2$$

Where  $\tau$  is the relaxation time (s), L is diffusion length (cm) of  $\text{Zn}^{2+}$  which is equal to thickness of electrode, and  $\Delta E_s$  is the steady-state potential change (V) by the current pulse.  $\Delta E_t$  is the potential change (V) during the constant current pulse after eliminating the  $iR$  drop. Current pulse of 100 mA  $\text{g}^{-1}$  was applied for 20 minutes while the followed relaxation time is 90 minutes.

## *Computational details*

All the calculations are performed in the framework of the density functional theory with the projector augmented plane-wave method, as implemented in the Vienna ab initio simulation package.<sup>2</sup> The generalized gradient approximation proposed by Perdew-Burke-Ernzerhof (PBE) is selected for the exchange-correlation potential.<sup>3</sup> The cut-off energy for plane wave is set to 480 eV. The energy criterion is set to  $10^{-4}$  eV in the iterative solution of the Kohn-Sham equation. All the structures are relaxed until the residual forces on the atoms have declined to less than 0.05 eV/Å. To avoid interlaminar interactions, a vacuum spacing of 20 Å is applied perpendicular to the slab.

Table S1. Comparison of design values of Mg:Mn and actual values measured by ICP.

| Designed Mg:Mn | ICP determined Mg:Mn |
|----------------|----------------------|
| 3:100          | 3.42779:100          |
| 4:100          | 4.35756:100          |
| 5:100          | 4.93704:100          |
| 6:100          | 5.94055:100          |

Table S2. Crystallographic data obtained from Rietveld refinements of the XRD patterns of the Mg-MnO (5%).

|                         |                    |
|-------------------------|--------------------|
| Lattice parameters(Å)   | a=b=c=4.401029     |
| Volume(Å <sup>3</sup> ) | 85.244             |
| Error factor            | wRp=4.82% Rp=3.15% |
| Mg/Mn-O(Å)              | 2.20051(2)         |
| Mn-Mg(Å)                | 3.11200(2)         |

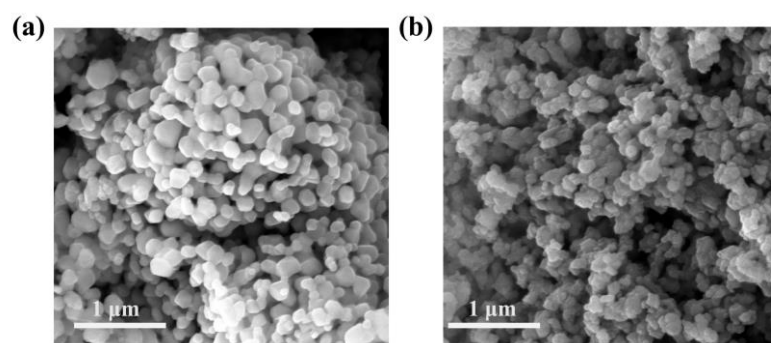

Fig. S1. SEM images of (a) pure MnO and (b) Mg-MnO(5%).

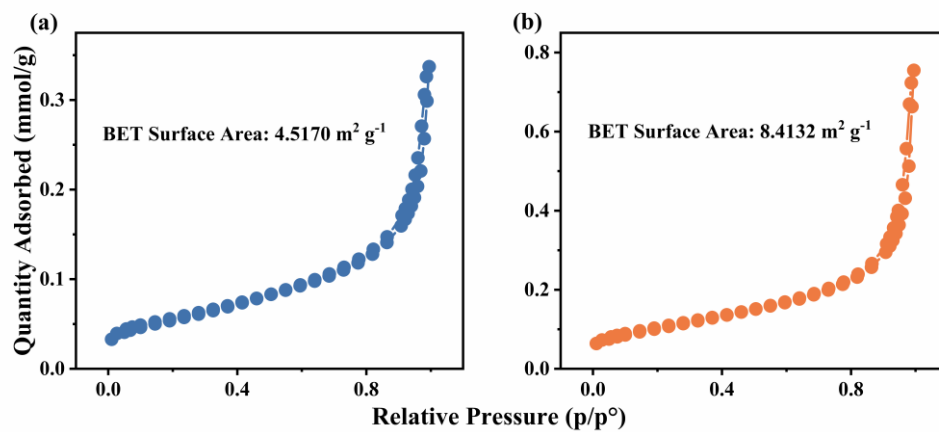

Fig. S2. N<sub>2</sub> adsorption/desorption isotherm of (a) pure MnO and (b) Mg-MnO(5%).

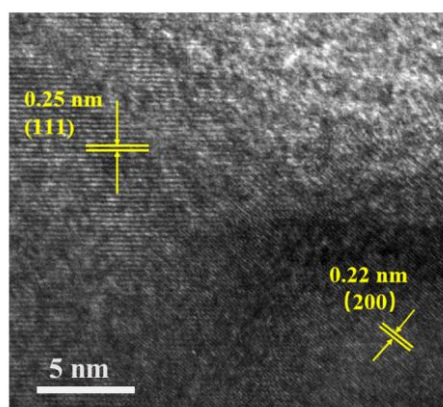

Fig. S3.TEM images of Mg-MnO(5%).

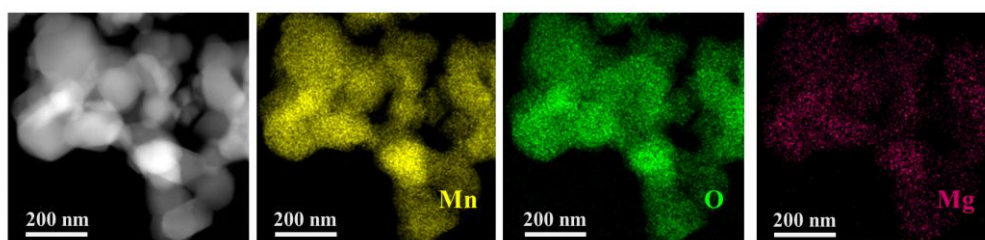

Fig. S4.EDX results of Mg-MnO(5%).



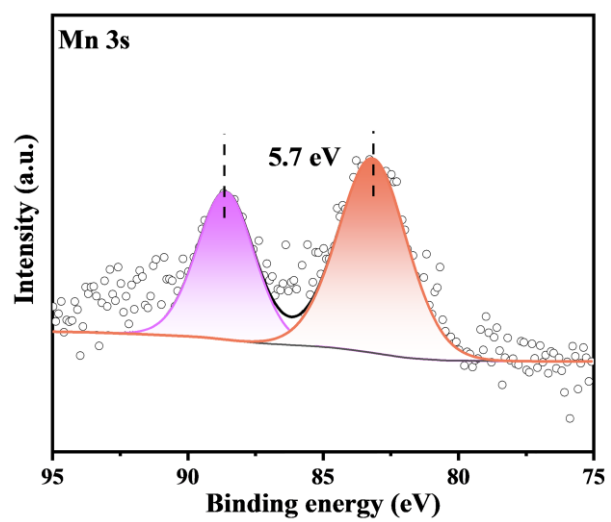

Fig. S5. XPS spectra of Mg-MnO(5%) of Mn 3s.

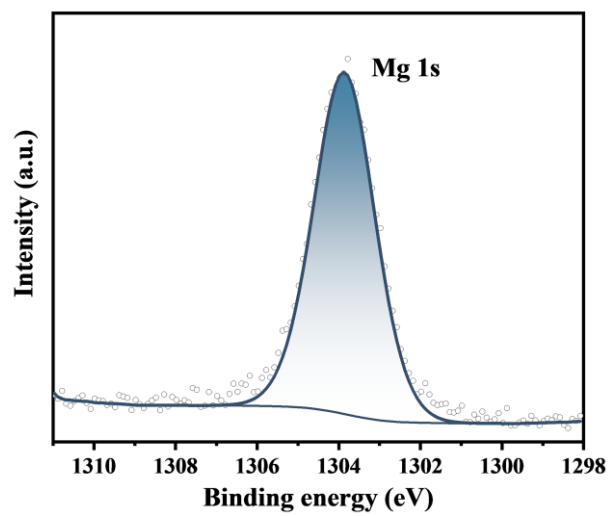

Fig. S6. XPS spectra of Mg-MnO(5%) of Mg 1s.

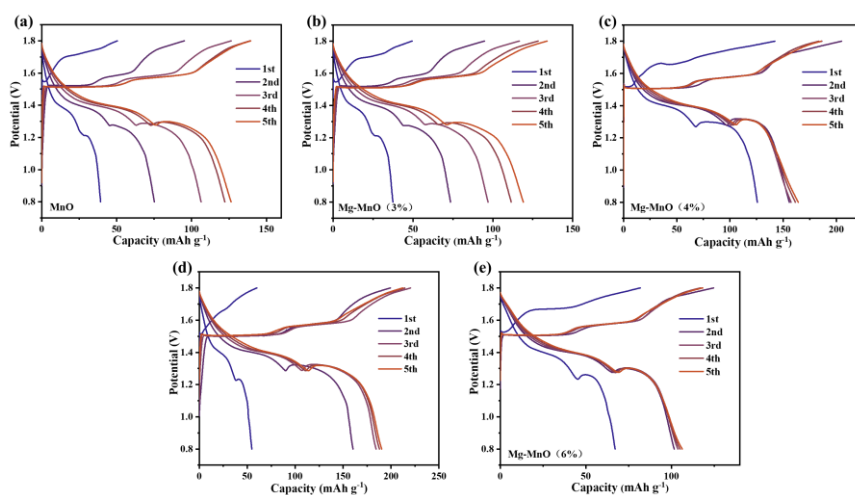

Fig. S7. The first five charge/discharge curves of the (a) pure MnO, (b) Mg-MnO(3%), (c) Mg-MnO(4%), (d) Mg-MnO(5%) and (e) Mg-MnO(6%) at 0.1 A g<sup>-1</sup>.

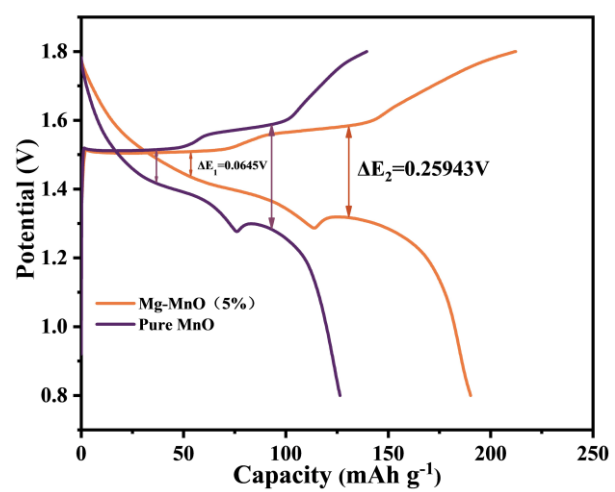

Fig. S8. The comparison of potential difference between MnO and Mg-MnO(5%).

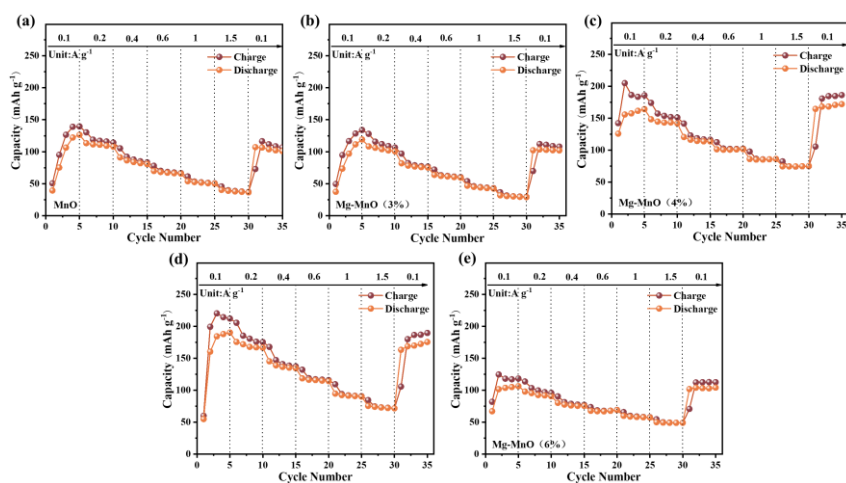

Fig. S9. The rate capabilities of the (a) pure MnO, (b) Mg-MnO(3%), (c) Mg-MnO(4%), (d) Mg-MnO(5%) and (e) Mg-MnO(6%) at 0.1 A g<sup>-1</sup>.

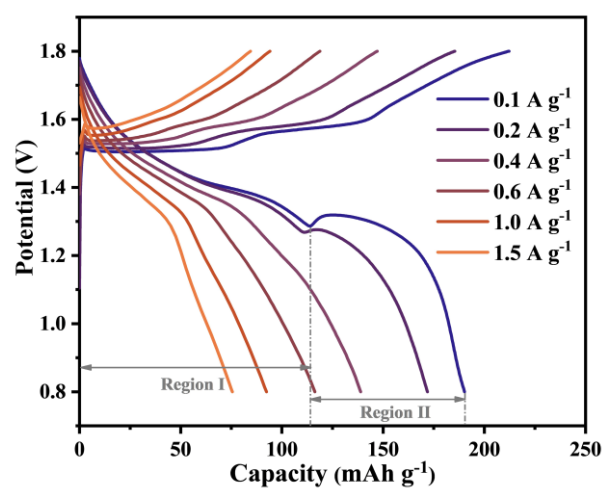

Fig. S10. Charge/discharge curves of Mg-MnO(5%) at different current densities.

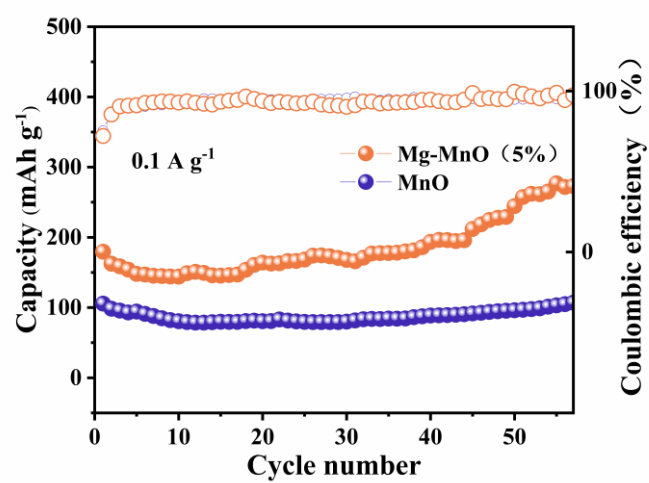

Fig. S11. Cycling performance at a current density of 0.1 A g<sup>-1</sup> for the MnO and Mg-MnO(5%).

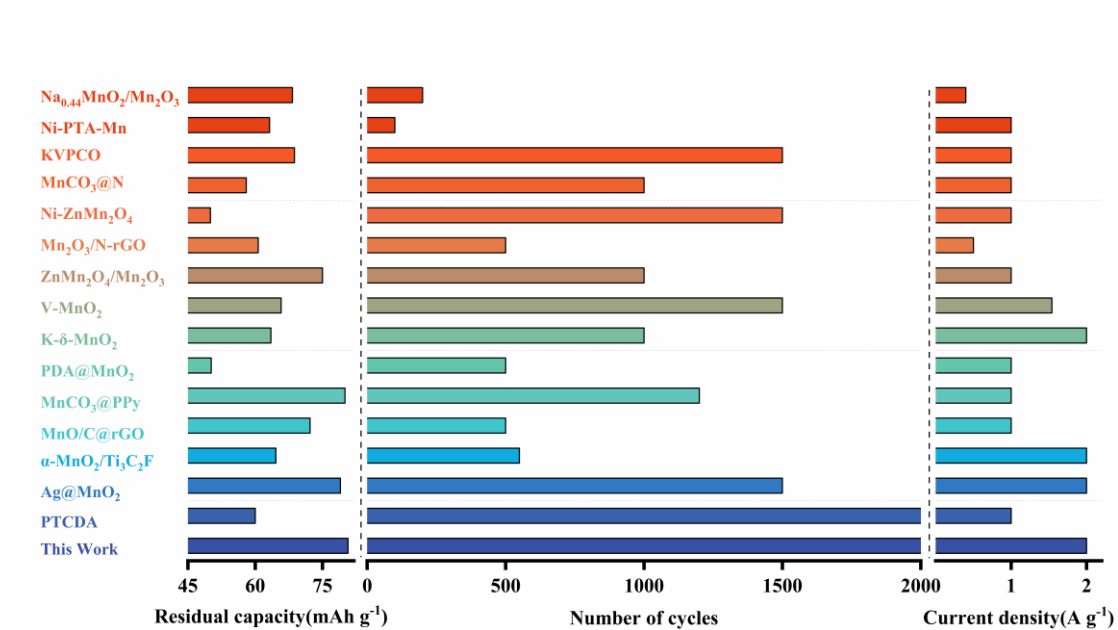

Fig. S12. Comparison of residual capacity after long-term cycling between this study and existing literature.<sup>4-18</sup>



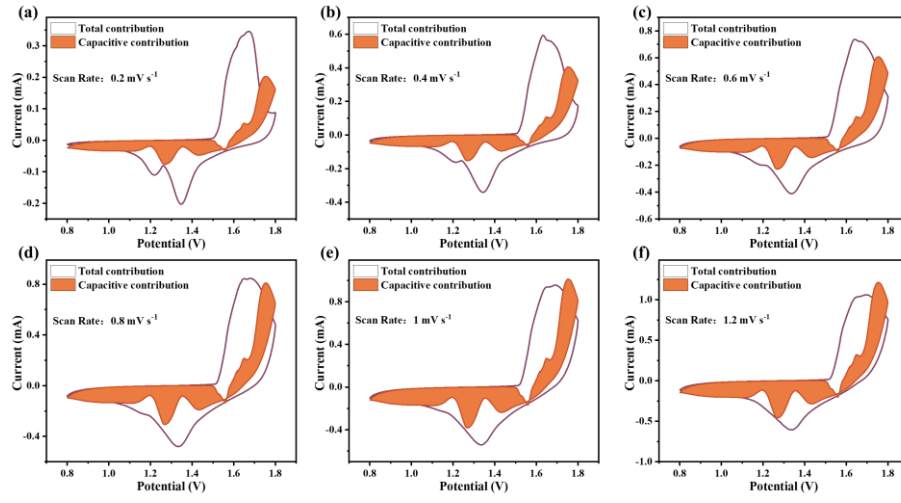

Fig. S13. Contribution ratios of the capacitive and diffusion-controlled capacities for Mg-MnO(5%) at (a)  $0.2 \text{ mV s}^{-1}$ , (b)  $0.4 \text{ mV s}^{-1}$ , (c)  $0.6 \text{ mV s}^{-1}$ , (d)  $0.8 \text{ mV s}^{-1}$ , (e)  $1 \text{ mV s}^{-1}$  and (f)  $1.2 \text{ mV s}^{-1}$ .

Table S3. Comparison of Mg:Mn ratios in the initial state and after the first charge cycle measured by ICP.

| State    | Mg: Mn      |
|----------|-------------|
| Pristine | 4.93704:100 |
| 1 charge | 14.9507:100 |

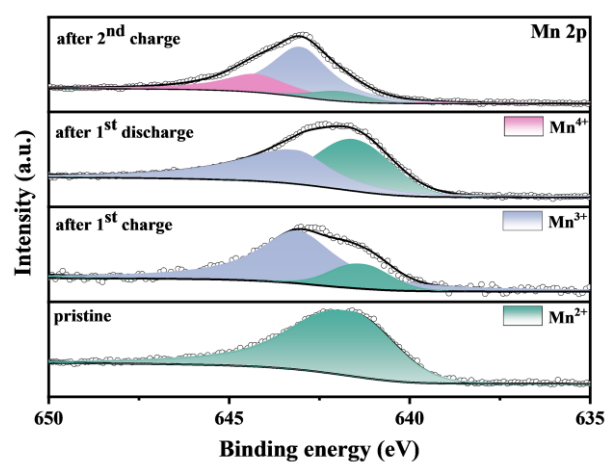

Fig. S14. Ex-situ XPS spectra of Mg-MnO(5%) of Mn 2p.

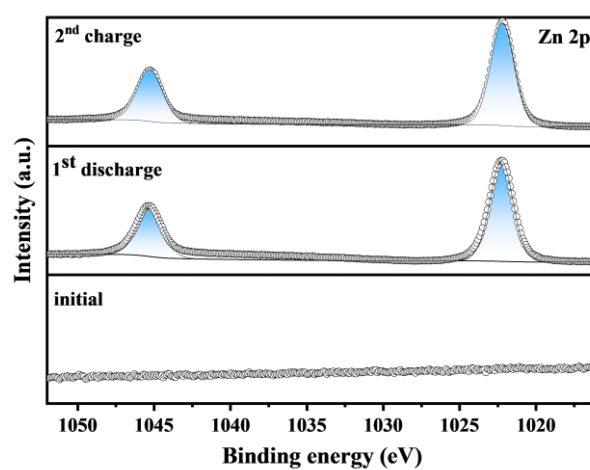

Fig. S15. Ex-situ XPS spectra of Mg-MnO(5%) of Zn 2p.

Table. S4. Comparison study of the integrated DOS plot from -1.0 eV to 1.0 eV for MnO and Mg-MnO.

| <b>DOS</b> | <b>MnO</b> | <b>Mg-MnO</b> |
|------------|------------|---------------|
| TDOS       | 100.0%     | 100.0%        |
| Mn 3d      | 68.21%     | 77.28%        |
| O 2p       | 17.34%     | 10.03%        |

## Reference:

1. B. He, J. Huang, P. Ji, T. K. A. Hoang, M. Han, L. Li, L. Zhang, Z. Gao, J. Ma, J. Zhi and P. Chen, *Journal of Power Sources*, 2023, **554**, 232353.
2. G. Kresse and D. Joubert, *Physical Review B*, 1999, **59**, 1758-1775.
3. K. B. John P. Perdew, Matthias Ernzerhof, *PHYSICAL REVIEW LETTERS*, 1996, **77**, 3865-3868.
4. F. Yu, Y. Wang, Y. Liu, H.-Y. Hui, F.-X. Wang, J.-F. Li and Q. Wang, *Rare Metals*, 2022, **41**, 2230-2236.
5. Y. Wang, T. Wang, W. Zhang, L. Li, X. Lv and H. Wang, *Dalton Transactions*, 2024, **53**, 5534-5543.
6. Y. Song, W. Zhan, Z. Wu, Q. Chen, X. Chen, Z. Liu, J. Du, C. Tao and Q. Zhang, *Journal of Materials Chemistry A*, 2024, **12**, 16910-16920.
7. F. Tang, J. Gao, Q. Ruan, X. Wu, X. Wu, T. Zhang, Z. Liu, Y. Xiang, Z. He and X. Wu, *Electrochimica Acta*, 2020, **353**, 136570.
8. L. Cao, Z. Gao, G. Lu, X. Chen, Y. Li, Y. Wu, R. Wang, H. Yuan, J. Hu, F. Wei, Z. Ji, Y. Sui, Q. Meng, L. Li and L. Zhang, *Colloids and Surfaces A: Physicochemical and Engineering Aspects*, 2023, **676**, 132295.
9. S. Li, Y. Wei, Q. Wu, Y. Han, G. Qain, J. Liu and C. Yang, *Materials Letters*, 2023, **348**.
10. Q. Xie, G. Cheng, T. Xue, L. Huang, S. Chen, Y. Sun, M. Sun, H. Wang and L. Yu, *Materials Today Energy*, 2022, **24**, 100934.
11. Y. Liu, Y. Wang, X. Zhang, Y. Song, Y. Yi, H. Yin, Y. Zhu, G. Xu and Y. Zheng, *ACS Materials Letters*, 2023, **5**, 2820-2828.
12. S.-C. Ma, M. Sun, S.-X. Wang, D.-S. Li, W.-L. Liu, M.-M. Ren, F.-G. Kong, S.-J. Wang and Y.-M. Xia, *Scripta Materialia*, 2021, **194**, 113707.
13. H. Yu, J. Sun, Z. Wang, M. Ren, Z. Yang, W. Liu, J. Yao, C. Zhang and H. Zhao, *Journal of Sol-Gel Science and Technology*, 2023, DOI: 10.1007/s10971-023-06201-y.
14. L. Qin, Q. Zhu, L. Li, H. Cheng, W. Li, Z. Fang, M. Mo and S. Chen, *Journal of Solid State Electrochemistry*, 2023, **27**, 773-784.
15. B. Yang, D. Li, S. Wang, C. Sun and N. Wang, *ACS Applied Materials & Interfaces*, 2022, **14**, 18476-18485.
16. Q. Zi-Wei, *Chinese Journal of Structural Chemistry*, 2021, **40**, 1535–1540.
17. C. Li, C. Zheng, H. Jiang, S. Bai and J. Jia, *Journal of Alloys and Compounds*, 2021, **882**, 160587.
18. X. Wu, S. Zhou, Y. Li, S. Yang, Y. Xiang, J. Jiang, Z. Liu, D. Fan, H. Zhang and L. Zhu, *Journal of Alloys and Compounds*, 2021, **858**, 157744.
